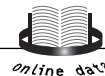

# Three-dimensional structure of recombinant type 1 inositol 1,4,5-trisphosphate receptor

Francis WOLFRAM\*, Edward MORRIS† and Colin W. TAYLOR\*<sup>1</sup>

\*Department of Pharmacology, University of Cambridge, Tennis Court Road, Cambridge CB2 1PD, U.K., and †Section of Structural Biology, Institute of Cancer Research, Chester Beatty Laboratories, London SW3 6JB, U.K.

IP<sub>3</sub>Rs (inositol 1,4,5-trisphosphate receptors) are the intracellular channels that mediate release of Ca<sup>2+</sup> from the endoplasmic reticulum in response to the many stimuli that evoke Ins(1,4,5)P<sub>3</sub> formation. We characterized and purified type 1 IP<sub>3</sub>R heterologously expressed in Sf9 insect cells, and used the purified IP<sub>3</sub>R1 to determine its three-dimensional structure by electron microscopy and single-particle analysis. Recombinant IP<sub>3</sub>R1 has 4-fold symmetry with overall dimensions of approx. 19.5 nm × 19.5 nm × 17.5 nm. It comprises a small domain, which is likely to include the pore, linked by slender bridges to a large cytoplasmic domain with four petal-like regions.

Our structures of recombinant IP<sub>3</sub>R1 and native cerebellar IP<sub>3</sub>R have similar appearances and dimensions. The only notable difference is the absence of a central stigma-like domain from the cytoplasmic region of recombinant IP<sub>3</sub>R1. The first structure of a recombinant IP<sub>3</sub>R is an important step towards developing three-dimensional structures of IP<sub>3</sub>R that better contribute to our understanding of the structural basis of IP<sub>3</sub>R activation.

**Key words:** calcium channel, electron microscopy (EM), inositol 1,4,5-trisphosphate receptor (IP<sub>3</sub>R), single-particle analysis (SPA).

## INTRODUCTION

Cytosolic Ca<sup>2+</sup> signals regulate diverse cellular activities and most of these signals arise from regulated opening of Ca<sup>2+</sup>-permeable channels. IP<sub>3</sub>Rs (inositol 1,4,5-trisphosphate receptors) are the most widely expressed of these channels [1]. Most IP<sub>3</sub>Rs are expressed in membranes of the ER (endoplasmic reticulum), but they are present also in the plasma membrane of some cells [2], in the nuclear envelope [3], in the Golgi apparatus [4] and perhaps also in secretory vesicles [5]. Three vertebrate genes encode closely related subunits of IP<sub>3</sub>Rs, each comprising ~2700 amino acid residues. The functional IP<sub>3</sub>R is a homo- or heterotetrameric assembly of these subunits [6–8]. Each subunit has a single Ins(1,4,5)P<sub>3</sub>-binding site, the Ins(1,4,5)P<sub>3</sub>-binding core (residues 224–604), which comprises two domains forming a clam-like structure that encloses a positively charged pocket to which Ins(1,4,5)P<sub>3</sub> binds [9]. The N-terminal of the IP<sub>3</sub>R (residues 1–223), the suppressor domain, is the only other region of the IP<sub>3</sub>R for which a high-resolution structure is available [10]. The head of its hammer-like structure forms a β-trefoil, whereas the handle comprises a helix–turn–helix motif [10]. Although the structural basis of IP<sub>3</sub>R activation remains poorly understood, it is clear that the suppressor domain provides an essential link between Ins(1,4,5)P<sub>3</sub> binding to the Ins(1,4,5)P<sub>3</sub>-binding core and opening of the pore [11,12]. Furthermore, the N-terminal of RyRs (ryanodine receptors), another major family of intracellular Ca<sup>2+</sup> channels, has a structure almost indistinguishable from that of the suppressor domain of IP<sub>3</sub>R1 [13], suggesting that both families of intracellular Ca<sup>2+</sup> channels may share similar gating mechanisms. For both RyRs and IP<sub>3</sub>Rs, the Ca<sup>2+</sup>-permeable pore of the channel is formed by the last pair of the six transmembrane helices of each subunit together with the luminal loop that links them. Intermediate-resolution structures of RyR, derived from

SPA (single-particle analysis) [14,15], together with sequence alignments [16,17] and mutagenesis [2,18] of both RyR [16,17] and IP<sub>3</sub>R [2,18,19] are consistent with the idea that the pore of both channels has a structure broadly similar to that of K<sup>+</sup> channels [20], with each pair of transmembrane helices cradling an intervening pore helix and selectivity filter. A direct interaction between the suppressor domain and the cytosolic helix that links the fourth and fifth transmembrane domains may mediate gating of IP<sub>3</sub>R [11,12].

High-resolution structures of the complete IP<sub>3</sub>R are ultimately required if the structural basis of its activation is to be fully resolved. To date, five intermediate-resolution (~30 Å, where 1 Å = 0.1 nm) structures of IP<sub>3</sub>R1 purified from cerebellum have been determined using EM (electron microscopy) and SPA [21–25]. These structures differ in their details, but they all show a 4-fold symmetry and have two distinct regions: a large cytoplasmic domain and a small domain, which is assumed to include the channel region [26]. The first three-dimensional structure to be published had the shape of an uneven dumbbell with a height of 17 nm, and with four arms radiating from the large cytoplasmic domain [22]. We presented a structure reminiscent of a flower, in which the stalk represents the channel domain, and the cytoplasmic regions are represented by the petals and stigma with overall dimensions of ~18 nm × 18 nm × 18 nm [23]. Serysheva et al. [24] described the structure of IP<sub>3</sub>R as a large cytoplasmic pinwheel with a smaller square-shaped transmembrane domain; its overall dimensions were ~25 nm × 25 nm × 19 nm. Hamada and Mikoshiba [28] compared the three-dimensional structures with and without Ca<sup>2+</sup> and suggested that Ca<sup>2+</sup> caused IP<sub>3</sub>R to switch from a mushroom-like (~19 nm × 19 nm × 16 nm) to a windmill-like (~22 nm × 22 nm × 18 nm) shape, with the head of the mushroom and the wings of the windmill representing cytosolic domains [21]. The most recent structure resembles

Abbreviations used: CLM, cytosol-like medium; DDM, dodecyl maltoside; ECFP, enhanced cyan fluorescent protein; EM, electron microscopy; ER, endoplasmic reticulum; IP<sub>3</sub>R, inositol 1,4,5-trisphosphate receptor; PBM, phosphate-buffered medium; PEG, poly(ethylene glycol); RyR, ryanodine receptor; SPA, single-particle analysis; TEM, Tris/EDTA medium.

<sup>1</sup> To whom correspondence should be addressed (email cwt1000@cam.ac.uk).

a heavily fenestrated hot-air balloon with dimensions of  $\sim 17 \text{ nm} \times 17 \text{ nm} \times 23 \text{ nm}$  [25]. In the 7–8 years since the publication of the first three-dimensional structures of native IP<sub>3</sub>R [22–24,28], there has been no significant progress towards the higher-resolution structures that are required if the structures are to contribute further to our understanding of the workings of IP<sub>3</sub>R.

One approach, with considerable potential to accelerate progress, is to extend EM and SPA analyses of the three-dimensional structure from native IP<sub>3</sub>R to recombinant proteins. The benefits might include simplified purification procedures (using tagged IP<sub>3</sub>R), isolation of more homogeneous protein samples than are likely to be present in native tissues, and the opportunity to introduce tags identifiable by EM to allow mapping of primary sequence to the three-dimensional structure. Similar approaches applied to RyR [29–32] have allowed our understanding of its three-dimensional structure to progress well beyond that of IP<sub>3</sub>R [33]. In the present study, we used EM and SPA to establish the first three-dimensional structure of recombinant IP<sub>3</sub>R1 heterologously expressed in Sf9 insect cells.

## EXPERIMENTAL

### Materials

Fetal bovine serum, primers, fungizone, gentamicin and BSA were from Sigma. ATP and Complete™ protease inhibitor cocktail were from Roche. DDM (dodecyl maltoside) was from Calbiochem. Restriction enzymes and most molecular biology reagents were from New England Biolabs. [<sup>3</sup>H]Ins(1,4,5)P<sub>3</sub> (18 Ci/mmol) was from PerkinElmer Life Sciences, and Ins(1,4,5)P<sub>3</sub> was from Alexis Biochemicals. PreScission protease and the HiTrap Q FF and Superose 6 10/300 GL columns were from GE Healthcare. Mag-fluo-4AM and Sf-900 II SFM medium were from Invitrogen. Other materials were from Sigma, Fisher Scientific or the sources specified in the text or earlier publications [12,34].

### Expression of IP<sub>3</sub>R1 in Sf9 cells

A pENTR1A vector encoding IP<sub>3</sub>R1 N-terminally tagged with ECFP (enhanced cyan fluorescent protein) (ECFP–IP<sub>3</sub>R1) was prepared from two existing pENTR1A vectors containing full-length rat IP<sub>3</sub>R1 (GenBank® accession number GQ233032.1) and another containing an ECFP-tagged N-terminus of IP<sub>3</sub>R1 (residues 1–604) by ligation after digestion with NheI and KpnI. The product provided the template from which PCR was used to engineer a C-terminal biotinylation sequence and PreScission cleavage site (Figure 1A). The reverse primer (5'-TGCATCTCGAGTTATTCGTGCCATTCTATTTTTGTGCTTCAAAGATGTCGTTGAGTCCGGGCCCTGGAACAGAAC-TTCCAGGGCTGGCTGCTGTGGGTTGACATTCATGTG-3') introduced the PreScission cleavage site and biotinylation sequence (Figure 1A). The forward primer [5'-ATGCAGAA-TTCGGATCCTGTACAACATGAGGCCCAAG-3', corresponding to bases (underlined) 6326–6351 of IP<sub>3</sub>R1] used a unique BstBI site near the 3' end of the open reading frame. The PCR product and ECFP–IP<sub>3</sub>R1 plasmid were digested with BstBI and XhoI and ligated to give a pENTR1A plasmid encoding the tagged IP<sub>3</sub>R1 shown in Figure 1(A). This IP<sub>3</sub>R1 construct was then transferred into artificial baculovirus DNA (BaculoDirect Linear DNA, Invitrogen) to create recombinant baculovirus DNA. High-titre viral stocks were prepared and the titre was determined by end-point dilution [35]. The sequence of the final construct was verified by DNA sequencing.

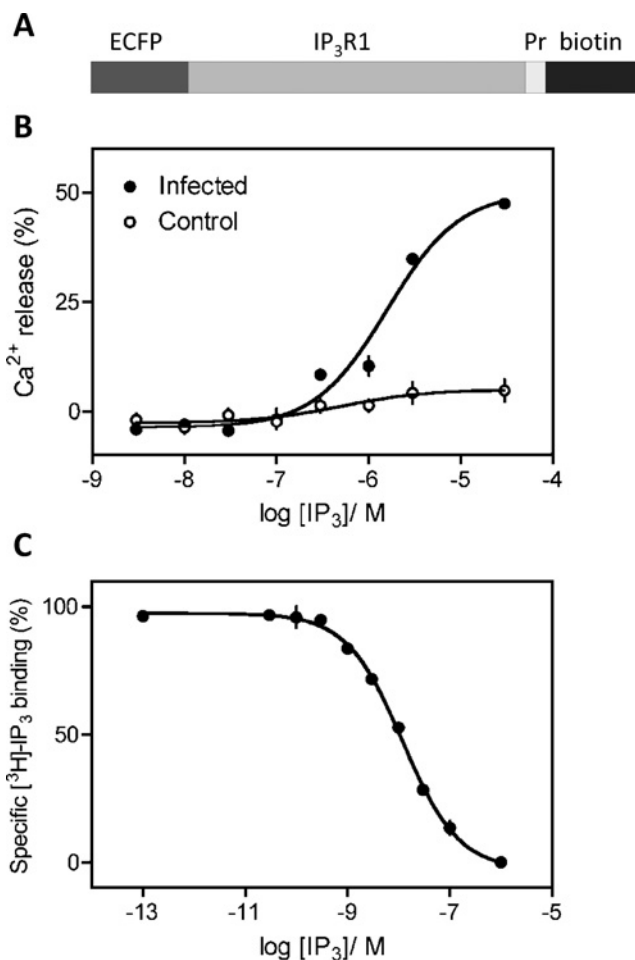

**Figure 1** Recombinant IP<sub>3</sub>R1 is functional

(A) The recombinant IP<sub>3</sub>R1 used has an N-terminal ECFP tag, a PreScission protease cleavage site (Pr) and the biotinylation sequence (biotin). (B) Ins(1,4,5)P<sub>3</sub>-evoked Ca<sup>2+</sup> release from permeabilized Sf9 cells with or without expression of recombinant IP<sub>3</sub>R1. (C) Specific binding of [<sup>3</sup>H]Ins(1,4,5)P<sub>3</sub> (1.5 nM) in the presence of the indicated concentrations of Ins(1,4,5)P<sub>3</sub> (IP<sub>3</sub>) to membranes prepared from Sf9 cells expressing recombinant IP<sub>3</sub>R1. Results (B and C) are means  $\pm$  S.E.M ( $n = 3$ ).

Sf9 cells were grown in Sf-900 II SFM medium supplemented with 10% fetal bovine serum, 2% fungizone and 1% gentamicin at pH 6.2 in flasks for virus production, and in spinner flasks (stirred at 70 rev./min) or shaking bottles (at 135 rev./min) for protein expression. Cultures were maintained at 27°C in a humid environment, and passaged every 7 days or when the density exceeded  $2 \times 10^6$  cells/ml. For protein expression, Sf9 cells were infected with ten virus particles/cell [MOI (multiplicity of infection) = 10] and harvested after 60 h.

### Purification of IP<sub>3</sub>R1 from Sf9 cells

All procedures were performed at 4°C, with incubations mixed by gentle rotation at 15 rev./min. Infected cells ( $3.2 \times 10^9$ ) were harvested by centrifugation at 700 *g* for 5 min, washed with TEM (Tris/EDTA medium: 50 mM Tris/HCl, 1 mM EDTA, pH 8.3, and protease inhibitor cocktail) and centrifuged at 700 *g* for 5 min. The pellet was suspended in TEM, homogenized with an Ultra Turrax (9500 rev./min, two rounds of ten strokes) and then with a glass homogenizer (60 strokes), centrifuged at 900 *g* for 10 min, and the supernatant was then centrifuged at 46 760 rev./min for 1 h

using a Beckman 70.1 Ti rotor. The pellet was suspended in TEM (7 ml) and biotinylated by incubation for 12–16 h with D-biotin (100  $\mu$ M) and biotin–protein ligase (BirA, 9  $\mu$ g in a final volume of 10 ml) according to the manufacturer's instructions (Avidity). Membranes were recovered by centrifugation at 46 760 rev./min for 1 h using a Beckman 70.1 Ti rotor.

Biotinylated membranes (16 mg of total protein/ml) were solubilized in PBM (phosphate-buffered medium: 100 mM Na<sub>2</sub>HPO<sub>4</sub>/NaH<sub>2</sub>PO<sub>4</sub>, 1 mM ETDA, 5 % glycerol, 150 mM NaCl, pH 8, protease inhibitor cocktail and 1 % DDM). The yield (~40%) after solubilization was lower than we and others have obtained using Triton X-100, but DDM is more widely used for solubilization of proteins for structural studies, and the background signals in EM were much lower with DDM than with Triton X-100. After 4 h, the supernatant was recovered after centrifugation at 46 760 rev./min for 1 h using a Beckman 70.1 Ti rotor and incubated for 1 h with streptavidin–agarose beads (Invitrogen) at 2 mg of protein/100  $\mu$ l of beads. The beads (100  $\mu$ l) were washed twice with PBM and then resuspended in 100  $\mu$ l of PrM (PreScission medium: 50 mM Tris/HCl, 150 mM NaCl, 1 mM EDTA, 1 mM dithiothreitol and 0.2 % DDM, pH 7) containing PreScission protease (4 units/100  $\mu$ l of beads). After incubation for 12 h, the supernatant was collected by centrifugation at 650 g for 5 min and applied to a HiTrap Q FF anion-exchange column, which was then washed (100 ml, 1 ml/min) with ion-exchange medium (50 mM Tris/HCl, 150 mM NaCl, 1 mM EDTA, 1 mM dithiothreitol, 5 % glycerol and 0.02 % DDM, pH 8.3). A linear gradient (150–500 mM NaCl in the same medium) was used to elute fractions of 0.5 ml, and the peak fractions (numbers 17–25) were pooled and concentrated to 0.5 ml with a Vivaspin-2 MWCO (molecular-mass cut-off) 30000 centrifugal concentrator (Sartorius). The concentrated sample was applied to a Superose 6 10/300 GL gel-filtration column, and fractions (0.5 ml) were eluted with ion-exchange medium (0.5 ml/min). Fractions 21–22 were pooled and used for EM.

Samples were analysed using pre-cast SDS/PAGE mini-gels (Invitrogen), and by immunoblotting using the iblot system (Invitrogen) with a rabbit peptide antiserum (1:1000) against the C-terminus of IP<sub>3</sub>R1 [12]. Anti-rabbit horseradish peroxidase-conjugated secondary antibody (AbCam, 1:5000) and Super Signal West Pico chemiluminescence reagent (Pierce) were used to detect immunoreactivity. The bands were quantified using GeneTools (Syngene). Protein gels were silver-stained using GelCode SilverSNAP II stain kit according to the manufacturer's instructions (Pierce).

### Ins(1,4,5)P<sub>3</sub>-evoked Ca<sup>2+</sup> release from intracellular stores

The free [Ca<sup>2+</sup>] within the ER was recorded using a low-affinity luminal Ca<sup>2+</sup> indicator, Mag-fluo-4, and a FlexStation plate-reader (MDS Analytical Technologies) [34]. Sf9 cells (~2 × 10<sup>6</sup>/ml) were incubated for 1 h at 20 °C with Mag-fluo-4AM (20  $\mu$ M) in HEPES-buffered medium (135 mM NaCl, 5.9 mM KCl, 11.6 mM HEPES, 1.5 mM CaCl<sub>2</sub>, 11.5 mM glucose and 1.2 mM MgCl<sub>2</sub>, pH 7.3) containing BSA (1 mg/ml) and Pluronic F127 (0.4 mg/ml). The cells were then resuspended in Ca<sup>2+</sup>-free CLM {cytosol-like medium: 20 mM NaCl, 140 mM KCl, 2 mM MgCl<sub>2</sub>, 1 mM EGTA, 375  $\mu$ M CaCl<sub>2</sub> (free [Ca<sup>2+</sup>] ~ 200 nM) and 20 mM Pipes, pH 7} containing saponin (10  $\mu$ g/ml). After ~10 min at 37 °C, the permeabilized cells were washed (650 g, 3 min), resuspended in Mg<sup>2+</sup>-free CLM with 10  $\mu$ M FCCP (carbonyl cyanide *p*-trifluoromethoxyphenylhydrazone), distributed into 96-well plates (6 × 10<sup>5</sup> or 2 × 10<sup>5</sup> cells in 50  $\mu$ l/well, for uninfected and infected cells respectively) and centrifuged at 1000 g for 3 min.

After addition of MgATP (1.5 mM), the intracellular stores were loaded to steady-state with Ca<sup>2+</sup>, and, after 150 s, Ins(1,4,5)P<sub>3</sub> was added with thapsigargin (1  $\mu$ M); the latter to inhibit further Ca<sup>2+</sup> uptake. Ins(1,4,5)P<sub>3</sub>-evoked Ca<sup>2+</sup> release is expressed as a fraction of the ATP-dependent Ca<sup>2+</sup> uptake. Concentration–effect relationships were fitted to a Hill equation using non-linear curve-fitting (GraphPad Prism, version 5).

### [<sup>3</sup>H]Ins(1,4,5)P<sub>3</sub> binding

Equilibrium-competition binding assays were performed at 4 °C in TEM (500  $\mu$ l) containing [<sup>3</sup>H]Ins(1,4,5)P<sub>3</sub> (1.5 nM), membranes (~30  $\mu$ g) or purified IP<sub>3</sub>R (~0.7  $\mu$ g), and appropriate concentrations of Ins(1,4,5)P<sub>3</sub>. After 5 min, during which equilibrium was attained, incubations were terminated by the addition of ice-cold TEM (500  $\mu$ l) containing PEG [poly(ethylene glycol)] 8000 (30 %) and  $\gamma$ -globulin (20  $\mu$ l of 25 mg/ml), mixed, incubated on ice for 5 min and then centrifuged at 20 000 g for 5 min. The pellet was rinsed twice with 500  $\mu$ l of TEM containing 15 % PEG 8000, and then resuspended to allow its radioactivity to be determined by liquid scintillation counting. Results were fitted to a Hill equation using GraphPad Prism from which the IC<sub>50</sub> and K<sub>d</sub> were determined.

### EM and image analysis

Purified IP<sub>3</sub>R1 was loaded on to glow-discharged carbon-coated copper grids and negatively stained with 2 % uranyl acetate. Micrographs were collected on a Tecnai T-12 electron microscope in low-dose mode (20 electrons/Å<sup>2</sup>) at a calibrated magnification of 41125, at 120 kV with ~700 nm defocus. The quality of the micrographs was assessed using an optical diffractometer. Only micrographs with circular and isotropic diffraction rings (Thon rings) consistent with a resolution of at least 20 Å within the first ring were used for further processing. Micrographs were digitized using a Nikon Coolscan 9000ED at a step size of 6.35  $\mu$ m. Scanned micrographs were then converted for processing using IMAGIC programs [36] and 3-pixel × 3-pixel areas were averaged, resulting in a final pixel size of 0.45 nm. The particles were selected with a box size of 100 pixels × 100 pixels using the BOXER tool of the EMAN package [37]. IMAGIC [36] was used for all other image processing, except for the multi-reference alignment routine for which SPIDER [38] was used. In the first multi-reference alignment and first angular assignment, our previously published IP<sub>3</sub>R structure [23], filtered to 54 Å, was used as a reference. The resolution of the three-dimensional reconstruction was determined using the half-bit criterion.

## RESULTS AND DISCUSSION

### Expression, purification and characterization of recombinant IP<sub>3</sub>R1

After optimization of methods, the outcome of which is described in the Experimental section, we established that infection of Sf9 cells with the tagged IP<sub>3</sub>R1 construct shown in Figure 1(A) allowed the expression of functional IP<sub>3</sub>R at a level considerably exceeding that of endogenous IP<sub>3</sub>R. Immunoblotting confirmed expression of IP<sub>3</sub>R1 of appropriate size (~300 kDa, see below) in the infected cells. After permeabilization, control and infected cells were each able to accumulate Ca<sup>2+</sup> after the addition of ATP. Ins(1,4,5)P<sub>3</sub> caused a barely resolvable Ca<sup>2+</sup> release from the control cells (maximal Ca<sup>2+</sup> release, 7 ± 1 %; EC<sub>50</sub>, 0.50 ± 0.05  $\mu$ M; Hill coefficient, 0.9 ± 0.17), but caused a very much larger release from the infected cells (maximal

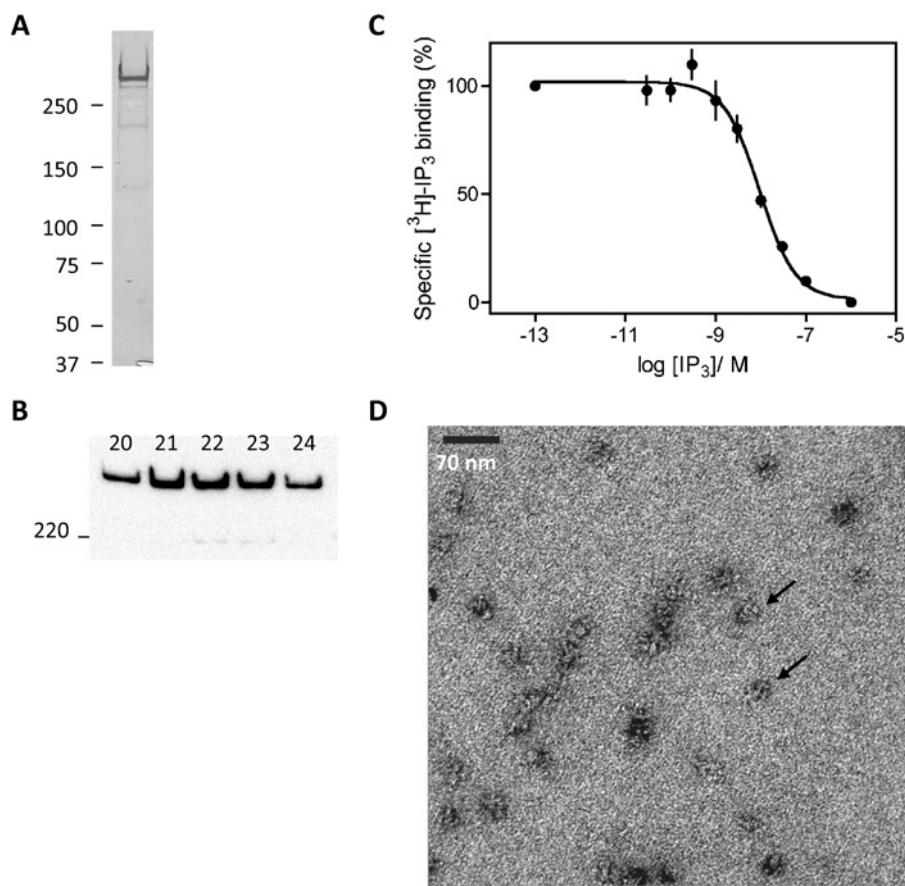

**Figure 2** Purification of recombinant IP<sub>3</sub>R

(**A** and **B**) Silver-stained gel (**A**, 0.12  $\mu$ g of protein/lane) and immunoblot with an IP<sub>3</sub>R1-specific antiserum (**B**, 0.12  $\mu$ g of protein/lane) of purified recombinant IP<sub>3</sub>R1 from fractions 20–24 of the gel-filtration step. Molecular-masses are shown in kDa. Results are typical of at least five similar analyses. (**C**) Specific binding of [<sup>3</sup>H]Ins(1,4,5)P<sub>3</sub> (1.5 nM) in the presence of the indicated concentrations of Ins(1,4,5)P<sub>3</sub> to purified recombinant IP<sub>3</sub>R1 (means  $\pm$  S.E.M,  $n = 3$ ). (**D**) Electron micrograph of purified recombinant IP<sub>3</sub>R1 highlighting particles (arrows) with the expected size of tetrameric IP<sub>3</sub>R ( $\sim 20$  nm diameter). Scale bar, 70 nm.

Ca<sup>2+</sup> release,  $47 \pm 2\%$ ; EC<sub>50</sub>,  $1.6 \pm 0.41 \mu$ M; Hill coefficient,  $1.1 \pm 0.17$  (Figure 1B). In equilibrium-competition assays with [<sup>3</sup>H]Ins(1,4,5)P<sub>3</sub> using membranes prepared from infected Sf9 cells, Ins(1,4,5)P<sub>3</sub> bound with high affinity ( $K_d$ ,  $10.49 \pm 1.06$  nM, Hill coefficient,  $0.80 \pm 0.08$ ) and the density of the sites ( $B_{max}$ ) was  $10.6 \pm 0.8$  pmol/mg of protein (Figure 1C). The affinity of the tagged IP<sub>3</sub>R1 expressed in Sf9 cells is similar to that determined under the same conditions for native IP<sub>3</sub>R1 in cerebellar membranes [12] and of untagged IP<sub>3</sub>R1 expressed in Sf9 cells [23,39,40], and the level of expression is  $\sim 40$ -fold higher than that of native IP<sub>3</sub>R in Sf9 cells [40].

After biotinylation and solubilization ( $\sim 40\%$  yield), recombinant IP<sub>3</sub>R1 was purified using streptavidin and then cleavage by PreScission protease ( $\sim 50\%$  yield), anion-exchange ( $\sim 16\%$  yield) and size-exclusion ( $\sim 70\%$  yield) chromatography (see the Experimental section). Calibration of the final chromatography step suggested an oligomeric size for the purified IP<sub>3</sub>R of  $\sim 1.56$  MDa, which is consistent with the predicted size of a tetramer of ECFP-tagged IP<sub>3</sub>R subunits ( $4 \times 339$  kDa) associated with DDM (see Supplementary Figure S1 at <http://www.BiochemJ.org/bj/428/bj4280483add.htm>). The final product migrated as a single band of appropriate size after SDS/PAGE and silver-staining (Figure 2A) or immunoblotting with an IP<sub>3</sub>R1-selective antiserum (Figure 2B). The  $K_d$  of the purified IP<sub>3</sub>R for Ins(1,4,5)P<sub>3</sub> was  $7.65 \pm 0.69$  nM, the Hill

coefficient was  $1.1 \pm 0.09$  (Figure 2C), and the final specific activity of the sites was  $0.25 \pm 0.02$  nmol/mg of protein (their concentration was 24  $\mu$ g of IP<sub>3</sub>R/ml). Electron micrographs of purified IP<sub>3</sub>R1 showed particles of the expected size ( $\sim 20$  nm) with their 4-fold symmetry clearly apparent in several profiles (Figure 2D).

These results establish that we have successfully expressed functional IP<sub>3</sub>R1 at high levels in Sf9 cells and purified them under conditions that allow their structure to be analysed by EM and SPA.

### Three-dimensional structure of recombinant IP<sub>3</sub>R1

The final dataset included 7064 particles selected from scanned micrographs. Particles were picked only if they were separated from others and had a size appropriate for an IP<sub>3</sub>R ( $\sim 20$  nm). The centred, but otherwise unaligned, particles were subject to multivariate statistical analysis, which yielded 69 eigenimages; the first ten are shown in Figure 3(A). A 4-fold symmetry is clearly visible in eigenimages 7 and 8, and a 3-fold symmetry is visible in eigenimages 3 and 4. The apparent 3-fold symmetry may reflect a side view of the IP<sub>3</sub>R, which published structures have suggested may be approximately triangular [23,28]. Much of the data comprises these side views or near side views, with only

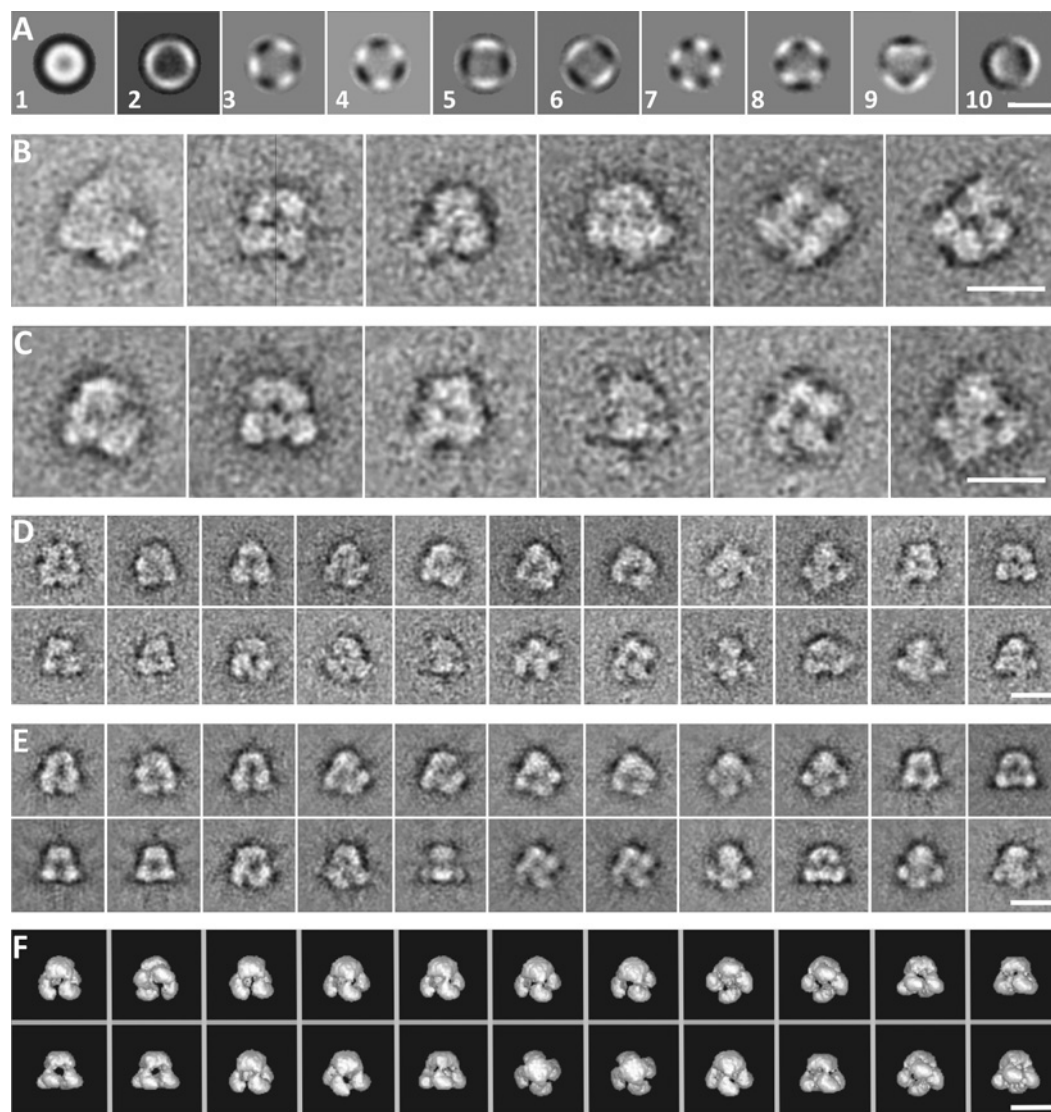

**Figure 3** Image analysis of IP<sub>3</sub>R particles

(A) Eigenimages of the unaligned dataset. Eigenimage 1 shows the sum of all images. Eigenimages 3 and 4 show approx. 3-fold symmetry. Eigenimages 5 and 6 show approx. 2-fold symmetry. Eigenimages 7 and 8 show 4-fold symmetry. (B) Class averages obtained independently after two iterative alignments (reference-free classes). (C) Similar class averages obtained after three iterative alignments using the filtered three-dimensional structure of native IP<sub>3</sub>R [23] as a reference for the first alignment. (D) Class averages used for the final three-dimensional reconstruction. (E) Re-projections of the final three-dimensional reconstruction corresponding to the class averages shown in (D). (F) Surface views of the final three-dimensional reconstruction in the same orientations as the class averages. Scale bars (A–F), 20 nm.

a fraction of the unaligned data showing 4-fold symmetry. The 2-fold symmetry in eigenimages 5 and 6 is probably caused by particles that correspond to slightly tilted top or bottom views. Because the IP<sub>3</sub>R is tetrameric [26,41] (Supplementary Figure S1) and all previous EM analyses established a 4-fold symmetry [21–25], we applied C4 symmetry to the later stages of our three-dimensional reconstruction.

Class averages of the IP<sub>3</sub>R were calculated after reference-free alignment using IMAGIC and then refined using the SPIDER alignment routine using class averages of the initial reference-free alignment (Figure 3B). Figure 3(C) shows the class averages obtained using native IP<sub>3</sub>R [23] as a reference. For the three-dimensional reconstruction, recombinant IP<sub>3</sub>R particles were aligned using the filtered native IP<sub>3</sub>R structure [23] as a reference in the first iteration; these are similar to the reference-free class averages (Figure 3B). Well-preserved classes with good signal-to-noise ratios were selected and back-projected to produce three-

dimensional maps used for further refinement of the classes. The class averages of each iteration cycle were used to obtain a three-dimensional reconstruction that was then used as a reference for the subsequent alignment. The three-dimensional reconstruction was stable after the third iteration. The fast stabilization of the analysis probably arises from our use of a refined structure of the IP<sub>3</sub>R [23] as an initial reference.

The final three-dimensional reconstruction contained 22 class averages with a good signal-to-noise ratio (Figures 3D–3F) and a wide distribution of Euler angles (see Supplementary Figure S2 at <http://www.BiochemJ.org/bj/428/bj4280483add.htm>). The resolution, measured using the half-bit criterion of the Fourier shell correlation, was approx. 40 Å (see Supplementary Figure S3 at <http://www.BiochemJ.org/bj/428/bj4280483add.htm>). The three-dimensional volume was contoured to accommodate a molecular mass of the recombinant IP<sub>3</sub>R1 of 1.3 MDa assuming a protein density of 844 Da/nm<sup>3</sup>. Figure 4(A) shows

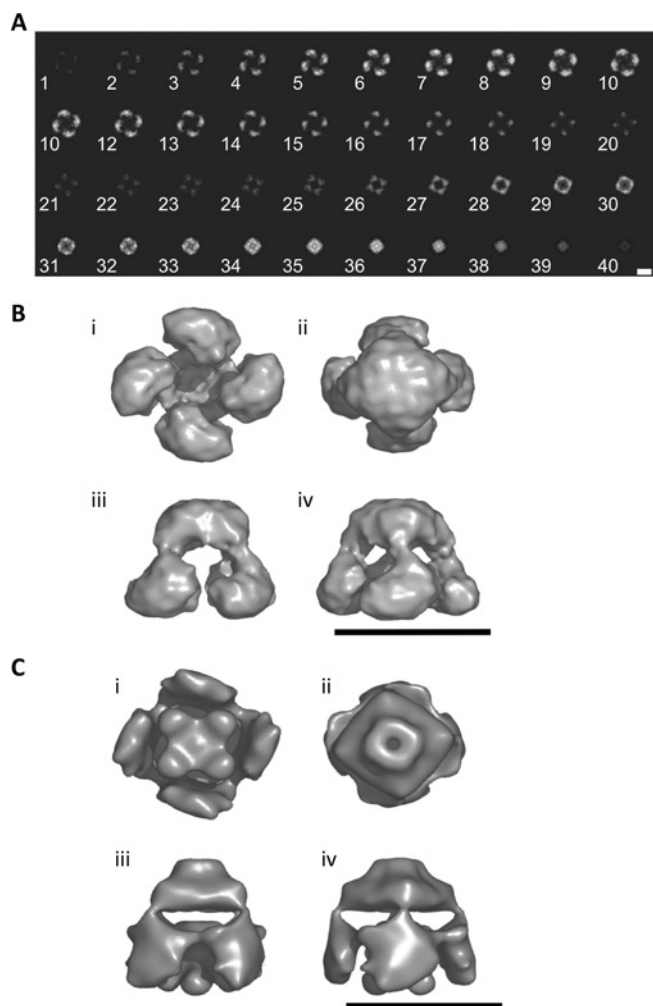

**Figure 4** Structure of recombinant IP<sub>3</sub>R1

(A) Each section (1–40) is 0.45 nm thick and viewed along the symmetry axis starting from the cytoplasmic end (1) to the end likely to be within the ER lumen (40). Scale bar, 10 nm. (B) Surface views of the three-dimensional reconstruction of recombinant IP<sub>3</sub>R1 viewed from the cytosol (i), from the lumen of the ER (ii) and two views in cross-section (iii and iv). (C) Views similar to those shown in (B), but for native cerebellar IP<sub>3</sub>R [23]. Scale bars (B and C), 20 nm.

the structure of the recombinant IP<sub>3</sub>R as sections (each 0.45 nm thick) cut along the symmetry axis and Figure 4(B) shows four characteristic views of the final three-dimensional reconstruction. The overall dimensions of the three-dimensional structure are  $\sim 19.5 \text{ nm} \times 19.5 \text{ nm} \times 17.5 \text{ nm}$ . It comprises a large cytoplasmic region ( $\sim 19.5 \text{ nm} \times 19.5 \text{ nm} \times 10 \text{ nm}$ ) consisting of four petal-like domains (each  $\sim 10.6 \text{ nm}$  wide) each connected to a smaller stalk-like channel region ( $\sim 13.2 \text{ nm} \times 13.2 \text{ nm} \times 7.5 \text{ nm}$ ). This region tapers towards the luminal side to a width of  $\sim 7.4 \text{ nm}$  (Figures 4A and 4B).

#### Comparison of the structures of native and recombinant IP<sub>3</sub>R and RyR

The three-dimensional structure of recombinant IP<sub>3</sub>R1, which is likely to be in a closed state, resembles the flower model of the native IP<sub>3</sub>R1 [23] (Figure 4C), but without the central stigma. The overall dimensions of the two structures are also similar:  $\sim 18 \text{ nm} \times 18 \text{ nm} \times 18 \text{ nm}$  for native IP<sub>3</sub>R1, and  $\sim 19.5 \text{ nm} \times 19.5 \text{ nm} \times 17.5 \text{ nm}$  for recombinant IP<sub>3</sub>R1

(Figures 4B and 4C). The cytoplasmic region of each structure is  $\sim 11 \text{ nm}$  high, and both have a putative channel region that tapers towards the luminal side to a width of  $\sim 7 \text{ nm}$ . The only substantial difference between the two structures is the absence of a central stigma-like domain from the large cytoplasmic region of recombinant IP<sub>3</sub>R1 (compare Figures 4B, i and 4C, i). It is unlikely that this results from inappropriate assembly of the tetrameric IP<sub>3</sub>R because the recombinant protein was functional and bound Ins(1,4,5)P<sub>3</sub> with appropriate affinity (Figures 1B and 1C). It may be that the N-terminal ECFP tag stabilized a different closed conformation of the IP<sub>3</sub>R or that the central stigma may represent an accessory protein [42] that is not present in the heterologous expression system. The three-dimensional structure of a native IP<sub>3</sub>R1 in a closed state from another group [21] and our structure of recombinant IP<sub>3</sub>R1 have similar overall dimensions ( $19 \text{ nm} \times 19 \text{ nm} \times 16 \text{ nm}$ ) and similarly sized channel domains ( $11 \text{ nm} \times 11 \text{ nm} \times 5.2 \text{ nm}$ ), and both lack a central stigma. However, the four cytoplasmic petal-like regions of our structure are discrete (Figure 4B, iii), but they are linked by slender bridges in the native structure [21]. A possible explanation is that the threshold set for the native model (1.7 MDa) is larger than the actual size of native IP<sub>3</sub>R (1.2 MDa), leading to inclusion of more density. The pinwheel structure of the native IP<sub>3</sub>R [24] has slightly larger dimensions ( $\sim 25 \text{ nm} \times 25 \text{ nm} \times 19 \text{ nm}$ ), but it shares the four petal-like features of the recombinant IP<sub>3</sub>R structure, although their links with the channel region are both more substantial and more centrally placed than in our structure (Figure 4B). The two remaining structures of native IP<sub>3</sub>R [22,25] have similar dimensions to published structures of native IP<sub>3</sub>R and to our structure of recombinant IP<sub>3</sub>R1, but neither has obvious petal-like domains or a stalk-like channel domain.

RyRs and IP<sub>3</sub>Rs are relatives that share many structural and functional features, although IP<sub>3</sub>Rs are only half the size of RyRs. Both are cation channels with relatively weak selectivity for bivalent over univalent cations ( $P_{\text{Ba}}/P_{\text{K}} \sim 7$ ), although IP<sub>3</sub>Rs have lesser single-channel conductance than do RyRs [43,44]. The dimensions and tapering square profile of the channel region of RyR ( $\sim 11.5 \text{ nm} \times 11.5 \text{ nm} \times 6 \text{ nm}$ ) [15] are similar to that of recombinant IP<sub>3</sub>R1 ( $13.2 \text{ nm} \times 13.2 \text{ nm} \times 7.5 \text{ nm}$ ) (Figure 4B). We note also that the large cytoplasmic region of RyR, like that of recombinant IP<sub>3</sub>R1, has a large central cavity rather than a stigma (Figure 4B).

In summary, we have provided the first three-dimensional structure of a recombinant IP<sub>3</sub>R at a resolution of  $\sim 40 \text{ \AA}$ . The dimensions of our structure and its essential features are similar to the shared structural features of IP<sub>3</sub>R purified from native sources (Figure 4). This establishes the utility of recombinant IP<sub>3</sub>R and EM and SPAs for further elaboration of the structural determinants of IP<sub>3</sub>R behaviour.

#### AUTHOR CONTRIBUTION

Colin Taylor and Edward Morris conceived and designed the study. Francis Wolfram performed the experimental and image analyses with help from Colin Taylor on the former and Edward Morris on the latter. Colin Taylor wrote the paper with input from Francis Wolfram and Edward Morris.

#### ACKNOWLEDGEMENTS

We thank Dr Paula da Fonseca for advice and assistance with EM and SPA analyses.

#### FUNDING

This work was supported by the Wellcome Trust [grant number 085295 (to C.W.T.)], the Institute of Cancer Research (to E.M.) and by a studentship to F.W. from the Newton Trust, Cambridge.

## REFERENCES

- 1 Taylor, C. W., Genazzani, A. A. and Morris, S. A. (1999) Expression of inositol trisphosphate receptors. *Cell Calcium* **26**, 237–251
- 2 Dellis, O., Dedos, S., Tovey, S. C., Taufiq-Ur-Rahman, Dubel, S. J. and Taylor, C. W. (2006) Ca<sup>2+</sup> entry through plasma membrane IP<sub>3</sub> receptors. *Science* **313**, 229–233
- 3 Stehno-Bittel, L., Lückhoff, A. and Clapham, D. E. (1995) Calcium release from the nucleus by InsP<sub>3</sub> receptor channels. *Neuron* **14**, 163–167
- 4 Pinton, P., Pozzan, T. and Rizzuto, R. (1998) The Golgi apparatus is an inositol 1,4,5-trisphosphate-sensitive Ca<sup>2+</sup> store, with functional properties distinct from those of the endoplasmic reticulum. *EMBO J.* **17**, 5298–5308
- 5 Gerasimenko, J. V., Lur, G., Sherwood, M. W., Ebusui, E., Tepikin, A. V., Mikoshiba, K., Gerasimenko, O. V. and Petersen, O. H. (2009) Pancreatic protease activation by alcohol metabolite depends on Ca<sup>2+</sup> release via acid store IP<sub>3</sub> receptors. *Proc. Natl. Acad. Sci. U.S.A.* **106**, 10758–10763
- 6 Supattapone, S., Worley, P. F., Baraban, J. M. and Snyder, S. H. (1988) Solubilization, purification, and characterization of an inositol trisphosphate receptor. *J. Biol. Chem.* **263**, 1530–1534
- 7 Chadwick, C. C., Saito, A. and Fleischer, S. (1990) Isolation and characterization of the inositol trisphosphate receptor from smooth muscle. *Proc. Natl. Acad. Sci. U.S.A.* **87**, 2132–2136
- 8 Furuichi, T., Yoshikawa, S., Miyawaki, A., Wada, K., Maeda, M. and Mikoshiba, K. (1989) Primary structure and functional expression of the inositol 1,4,5-trisphosphate-binding protein P<sub>400</sub>. *Nature* **342**, 32–38
- 9 Bosanac, I., Alattia, J.-R., Mal, T. K., Chan, J., Talarico, S., Tong, F. K., Tong, K. I., Yoshikawa, F., Furuichi, T., Iwai, M. et al. (2002) Structure of the inositol 1,4,5-trisphosphate receptor binding core in complex with its ligand. *Nature* **420**, 696–700
- 10 Bosanac, I., Yamazaki, H., Matsu-ura, T., Michikawa, M., Mikoshiba, K. and Ikura, M. (2005) Crystal structure of the ligand binding suppressor domain of type 1 inositol 1,4,5-trisphosphate receptor. *Mol. Cell* **17**, 193–203
- 11 Schug, Z. T. and Joseph, S. K. (2006) The role of the S4–S5 linker and C-terminal tail in inositol 1,4,5-trisphosphate receptor function. *J. Biol. Chem.* **281**, 24431–24440
- 12 Rossi, A. M., Riley, A. M., Tovey, S. C., Rahman, T., Dellis, O., Taylor, E. J. A., Veresov, V. G., Potter, B. V. L. and Taylor, C. W. (2009) Synthetic partial agonists reveal key steps in IP<sub>3</sub> receptor activation. *Nat. Chem. Biol.* **5**, 631–639
- 13 Amador, F. J., Liu, S., Ishiyama, N., Plevin, M. J., Wilson, A., MacLennan, D. H. and Ikura, M. (2009) Crystal structure of type 1 ryanodine receptor amino-terminal  $\beta$ -trefoil domain reveals a disease-associated mutation “hot spot” loop. *Proc. Natl. Acad. Sci. U.S.A.* **106**, 11040–11044
- 14 Ludtke, S. J., Serysheva, I. I., Hamilton, S. L. and Chiu, W. (2005) The pore structure of the closed RYR1 channel. *Structure* **13**, 1203–1211
- 15 Samsó, M., Wagenknecht, T. and Allen, P. D. (2005) Internal structure and visualization of transmembrane domains of the RyR1 calcium release channel by cryo-EM. *Nat. Struct. Mol. Biol.* **6**, 539–544
- 16 Ramachandran, S., Serohijos, A. W., Xu, L., Meissner, G. and Dokholyan, N. V. (2009) A structural model of the pore-forming region of the skeletal muscle ryanodine receptor (RyR1). *PLoS Comput. Biol.* **5**, e1000367
- 17 Balshaw, D., Gao, L. and Meissner, G. (1999) Luminal loop of the ryanodine receptor: a pore-forming segment? *Proc. Natl. Acad. Sci. U.S.A.* **96**, 3345–3347
- 18 Schug, Z. T., da Fonseca, P. C., Bhanumathy, C. D., Wagner, 2nd, L., Zhang, X., Bailey, B., Morris, E. P., Yule, D. I. and Joseph, S. K. (2008) Molecular characterization of the inositol 1,4,5-trisphosphate receptor pore-forming segment. *J. Biol. Chem.* **283**, 2939–2948
- 19 Ramos-Franco, J., Galvan, D., Mignery, G. A. and Fill, M. (1999) Location of the permeation pathway in the recombinant type-1 inositol 1,4,5-trisphosphate receptor. *J. Gen. Physiol.* **114**, 243–250
- 20 MacKinnon, R. (2004) Potassium channels and the atomic basis of selective ion conduction (Nobel Lecture). *Angew. Chem. Int. Edn. Engl.* **43**, 4265–4277
- 21 Hamada, K., Terauchi, A. and Mikoshiba, K. (2003) Three-dimensional rearrangements with inositol 1,4,5-trisphosphate receptor by calcium. *J. Biol. Chem.* **278**, 52881–52889
- 22 Jiang, Q.-X., Thrower, E. C., Chester, D. W., Ehrlich, B. E. and Sigworth, F. J. (2002) Three-dimensional structure of the type 1 inositol 1,4,5-trisphosphate receptor at 24 Å resolution. *EMBO J.* **21**, 3575–3581
- 23 da Fonseca, P. C. A., Morris, S. A., Nerou, E. P., Taylor, C. W. and Morris, E. P. (2003) Domain organisation of the type 1 inositol 1,4,5-trisphosphate receptor as revealed by single-particle analysis. *Proc. Natl. Acad. Sci. U.S.A.* **100**, 3936–3941
- 24 Serysheva, I. I., Bare, D. J., Ludtke, S. J., Kettlun, C. S., Chiu, W. and Mignery, G. A. (2003) Structure of the type 1 inositol 1,4,5-trisphosphate receptor revealed by electron cryomicroscopy. *J. Biol. Chem.* **278**, 21319–21322
- 25 Sato, C., Hamada, K., Ogura, T., Miyazawa, A., Iwasaki, K., Hiroaki, Y., Tani, K., Terauchi, A., Fujiyoshi, Y. and Mikoshiba, K. (2004) Inositol 1,4,5-trisphosphate receptor contains multiple cavities and L-shaped ligand-binding domains. *J. Mol. Biol.* **336**, 155–164
- 26 Taylor, C. W., da Fonseca, P. C. A. and Morris, E. P. (2004) IP<sub>3</sub> receptors: the search for structure. *Trends Biochem. Sci.* **29**, 210–219
- 27 Reference deleted
- 28 Hamada, K. and Mikoshiba, K. (2002) Two-state conformational changes in inositol 1,4,5-trisphosphate receptor regulated by calcium. *J. Biol. Chem.* **277**, 21115–21118
- 29 Jones, P. P., Meng, X., Xiao, B., Cai, S., Bolstad, J., Wagenknecht, T., Liu, Z. and Chen, S. R. (2008) Localization of PKA phosphorylation site, Ser<sup>2030</sup>, in the three-dimensional structure of cardiac ryanodine receptor. *Biochem. J.* **410**, 261–270
- 30 Wang, R., Chen, W., Cai, S., Zhang, J., Bolstad, J., Wagenknecht, T., Liu, Z. and Chen, S. R. (2007) Localization of an NH<sub>2</sub>-terminal disease-causing mutation hot spot to the “clamp” region in the three-dimensional structure of the cardiac ryanodine receptor. *J. Biol. Chem.* **282**, 17785–17793
- 31 Liu, Z., Zhang, J., Li, P., Chen, S. R. W. and Wagenknecht, T. (2002) Three-dimensional reconstruction of the recombinant type 2 ryanodine receptor and localization of its divergent region 1. *J. Biol. Chem.* **277**, 46712–46719
- 32 Liu, X., Zhang, J., Sharma, M. R., Li, P., Chen, S. R. W. and Wagenknecht, T. (2001) Three-dimensional reconstruction of the recombinant type 3 ryanodine receptor and localization of its amino terminus. *Proc. Natl. Acad. Sci. U.S.A.* **98**, 6104–6109
- 33 Hamilton, S. L. and Serysheva, I. I. (2009) Ryanodine receptor structure: progress and challenges. *J. Biol. Chem.* **284**, 4047–4051
- 34 Tovey, S. C., Sun, Y. and Taylor, C. W. (2006) Rapid functional assays of intracellular Ca<sup>2+</sup> channels. *Nat. Protoc.* **1**, 258–262
- 35 O’Reilly, D. R., Miller, L. K. and Lucklow, V. A. (1994) *Baculovirus Expression Vectors*, Oxford University Press, Oxford
- 36 van Heel, M., Harauz, G., Orlova, E. V., Schmidt, R. and Schatz, M. (1996) A new generation of the IMAGIC image processing system. *J. Struct. Biol.* **116**, 17–24
- 37 Ludtke, S. J., Baldwin, P. R. and Chiu, W. (1999) EMAN: semiautomated software for high-resolution single-particle reconstructions. *J. Struct. Biol.* **128**, 82–97
- 38 Frank, J., Radermacher, M., Penczek, P., Zhu, J., Li, Y., Ladjadj, M. and Leith, A. (1996) SPIDER and WEB: processing and visualization of images in 3D electron microscopy and related fields. *J. Struct. Biol.* **116**, 190–199
- 39 Nerou, E. P., Riley, A. M., Potter, B. V. L. and Taylor, C. W. (2001) Selective recognition of inositol phosphates by subtypes of inositol trisphosphate receptor. *Biochem. J.* **355**, 59–69
- 40 Cardy, T. J. A., Traynor, D. and Taylor, C. W. (1997) Differential regulation of types 1 and 3 inositol trisphosphate receptors by cytosolic Ca<sup>2+</sup>. *Biochem. J.* **328**, 785–793
- 41 Foskett, J. K., White, C., Cheung, K. H. and Mak, D. O. (2007) Inositol trisphosphate receptor Ca<sup>2+</sup> release channels. *Physiol. Rev.* **87**, 593–658
- 42 Patterson, R. L., Boehning, D. and Snyder, S. H. (2004) Inositol 1,4,5-trisphosphate receptors as signal integrators. *Annu. Rev. Biochem.* **73**, 437–465
- 43 Rahman, T. and Taylor, C. W. (2009) Dynamic regulation of IP<sub>3</sub> receptor clustering and activity by IP<sub>3</sub>. *Channels* **3**, 336–332
- 44 Williams, A. J., West, D. J. and Sitsapesan, R. (2001) Light at the end of the Ca<sup>2+</sup>-release channel tunnel: structures and mechanisms involved in ion translocation in ryanodine receptor channels. *Q. Rev. Biophys.* **34**, 61–104



## SUPPLEMENTARY ONLINE DATA

# Three-dimensional structure of recombinant type 1 inositol 1,4,5-trisphosphate receptor

Francis WOLFRAM\*, Edward MORRIS† and Colin W. TAYLOR\*<sup>1</sup>

\*Department of Pharmacology, University of Cambridge, Tennis Court Road, Cambridge CB2 1PD, U.K., and †Section of Structural Biology, Institute of Cancer Research, Chester Beatty Laboratories, London SW3 6JB, U.K.

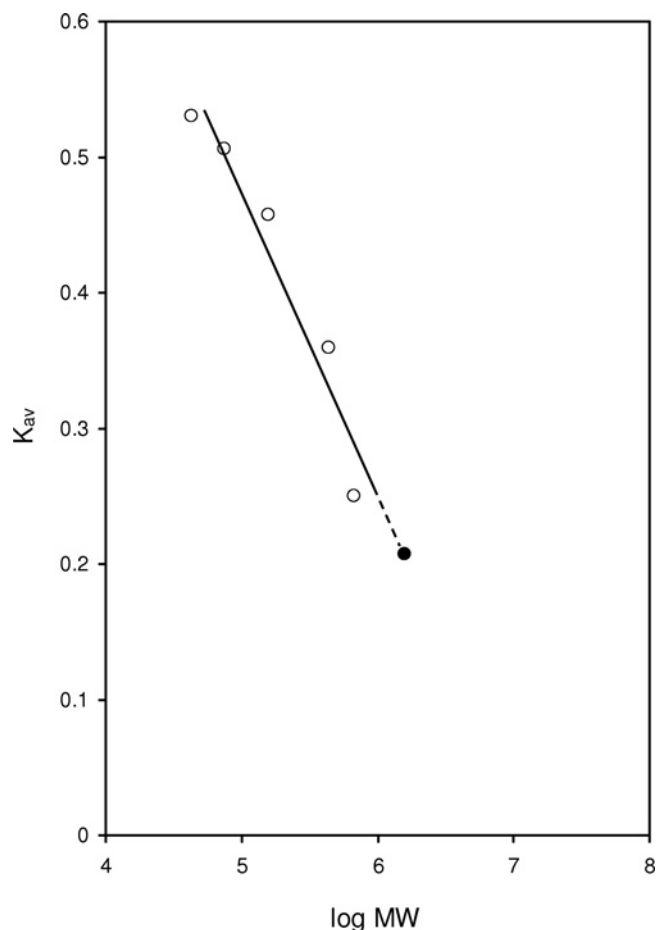

**Figure S1** Estimated size of purified IP<sub>3</sub>R1 from gel filtration

Calibration of the Superose 6 10/300 GL column used for the final purification step allowed the molecular mass of the purified IP<sub>3</sub>R1 to be estimated. The standards used were: ovalbumin, 43 kDa; conalbumin, 75 kDa; aldolase, 158 kDa; ferritin, 440 kDa; and thyroglobulin, 669 kDa (gel filtration calibration kit HMW, GE Healthcare, ○). The gel-phase distribution coefficient ( $K_{av}$ ) was calculated from [1]:  $K_{av} = (V_e - V_0)/(V_c - V_0)$  where  $V_e$  is elution volume,  $V_0$  is void volume (determined using Blue Dextran), and  $V_c$  is column volume. From the calibration curve [ $K_{av}$  against log molecular mass (MW), continuous line],  $K_{av}$  for the purified IP<sub>3</sub>R1 suggests a molecular mass of 1.56 MDa (●). Under the conditions used for IP<sub>3</sub>R1 purification (0.02% DDM), the DDM micelle (aggregation number > 140 for concentrations above the critical micellar concentration) is likely to contribute a further molecular mass of at least 70 kDa. We conclude that the observed mass (1.56 MDa) is consistent with the purified recombinant IP<sub>3</sub>R1 being a tetramer ( $4 \times 339$  kDa = 1.36 MDa) associated with DDM and perhaps also endogenous lipids.

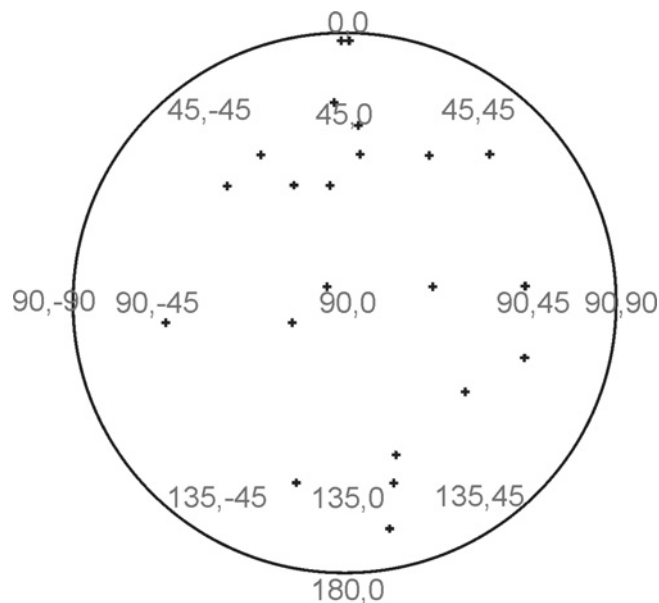

**Figure S2** Euler angle distribution of final class averages

The Euler angle sphere shows the assigned Euler angles of the 22 class averages used to obtain the final three-dimensional reconstruction. Each class average image is assigned three Euler angles to describe the rotations that have to be performed to obtain the desired view of the three-dimensional structure. The  $\alpha$  angles are set to 0° and are not shown; the other two angles define where the images are within the Euler sphere.

<sup>1</sup> To whom correspondence should be addressed (email cwt1000@cam.ac.uk).



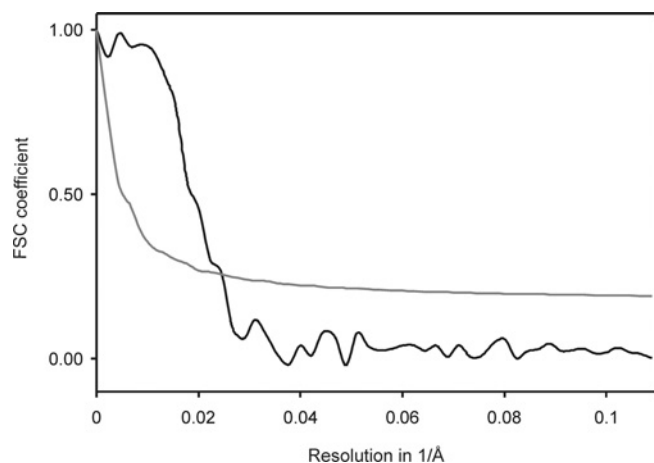

### Figure S3 Resolution of the final three-dimensional reconstruction

The Fourier shell correlation (FSC) coefficients were calculated for the two subsets of the final class averages and plotted (black line) together with the half-bit curve (grey line). The resolution of the final three-dimensional reconstruction, given by the crossing of the two curves, is  $\sim 40$  Å.

### REFERENCE

- 1 Wilson, K. and Walker, J. (2000) Principles and Techniques of Practical Biochemistry, 5th., Cambridge University Press, Cambridge

Received 25 January 2010/29 March 2010; accepted 8 April 2010

Published as BJ Immediate Publication 8 April 2010, doi:10.1042/BJ20100143
